# Supplementary material for: Injectable and self-healable nano-architectured hydrogel for NIR-light responsive chemo- and photothermal bacterial eradication
Source: Royal Society of Chemistry journal article supplement (doi:10.1039/d3tb02693k), 2024-01-01
Supplement: d3tb02693k1.pdf [file d3tb02693k1.pdf]

**Injectable and self-healable nano-architected hydrogel for NIR-light responsive chemo- and photothermal bacterial eradication**

Daniel Rybak<sup>a</sup>, Chiara Rinoldi<sup>a</sup>, Paweł Nakielski<sup>a</sup>, Jingtao Du<sup>b</sup>, Mohammad Ali Haghighat Bayan<sup>a</sup>, Seyed Shahrooz Zargarian<sup>a</sup>, Michał Pruchniewski<sup>c</sup>, Xiaoran Li<sup>b</sup>, Barbara Strojny-Cieślak<sup>c</sup>, Bin Ding<sup>b</sup>, and Filippo Pierini<sup>a\*</sup>

- <sup>a.</sup> Department of Biosystems and Soft Matter, Institute of Fundamental Technological Research, Polish Academy of Sciences, Warsaw 02-106, Poland
- <sup>b.</sup> Innovation Center for Textile Science and Technology, College of Textiles, Donghua University, Shanghai 201620, China
- <sup>c.</sup> Department of Nanobiotechnology, Institute of Biology, Warsaw University of Life Sciences, Warsaw 02-787, Poland

\*Corresponding Author

E-mail address: fpierini@ippt.pan.pl

Keywords: stimuli-responsive hydrogel, short-filaments, injectability, multi-functional materials, antibacterial material, drug delivery, photo-thermal therapy

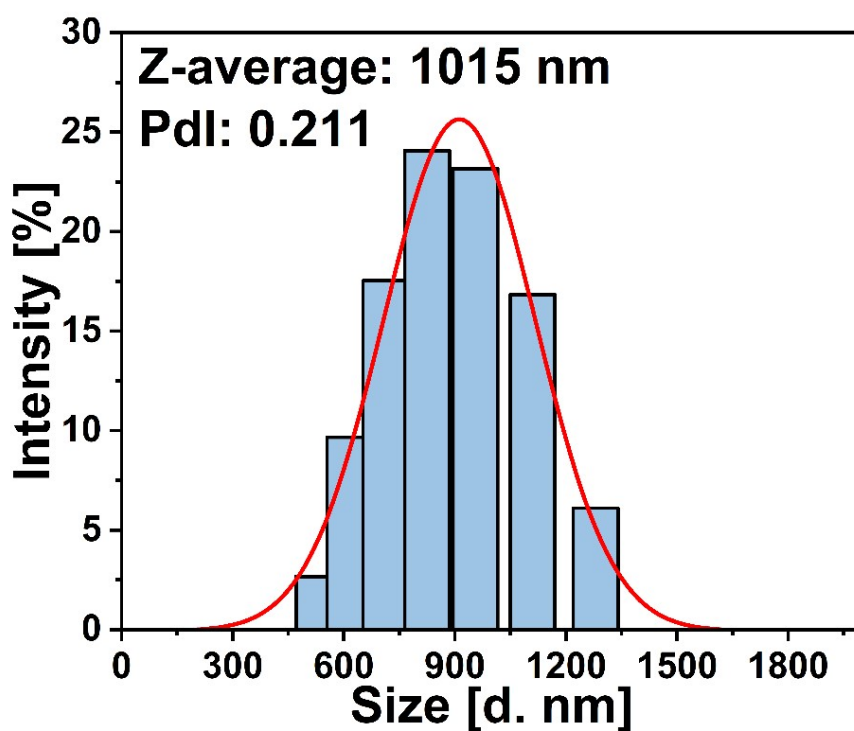

**Fig. S1.** The DLS measurement representing the PDA particle distribution, average size, and PDI.

**Table S1.** Different ratios of PF127/SA tested during the hydrogel optimization process

| Formulation | PF127 (%) | SA (%) | PDA (%) | SFs (%) | T <sub>gel</sub> (°C) |
|-------------|-----------|--------|---------|---------|-----------------------|
| PF127/SA1   | 15        | 1,5    | 0       | 0       | -                     |
| PF127/SA2   | 17,5      | 1      | 0       | 0       | 25                    |
| PF127/SA3   | 17,5      | 1,5    | 0       | 0       | 27                    |
| PF127/SA4   | 17,5      | 2      | 0       | 0       | -                     |
| PF127/SA5   | 20        | 1      | 0       | 0       | 23                    |
| PF127/SA6   | 20        | 1,5    | 0       | 0       | 25                    |
| PF127/SA7   | 17,5      | 1,5    | 0,5     | 1       | 30                    |
